# Supplementary material
Source: MDPI journal article supplement (https://www.mdpi.com/2073-4441/12/7/2024)
Supplement: s1 [file s1]

# Geochemical Fractionation and Risk Assessment of Potentially Toxic Elements in Sediments from Kupa River, Croatia

Sanja Sakan <sup>1,\*</sup>, Stanislav Frančišković-Bilinski <sup>2,\*</sup>, Dragana Đorđević <sup>1</sup>, Aleksandar Popović <sup>3</sup>, Sandra Škrivanj <sup>3</sup> and Halka Bilinski <sup>2</sup>

<sup>1</sup> Centre of Excellence in Environmental Chemistry and Engineering–ICTM, University of Belgrade, Njegoševa 12, 11158 Belgrade, Serbia; dragadj@chem.bg.ac.rs

<sup>2</sup> Ruđer Bošković Institute, Division for marine and environmental research, 10000 Zagreb, Croatia; bilinski@irb.hr

<sup>3</sup> Faculty of Chemistry, University of Belgrade, Studentski trg 12-16, Belgrade 11000, Serbia; apopovic@chem.bg.ac.rs (A.P.); sandra\_skrivanj@chem.bg.ac.rs (S.Š.)

\* Correspondence: ssakan@chem.bg.ac.rs (S.S.); francis@irb.hr (S.F.-B.)

## Figure Captions:

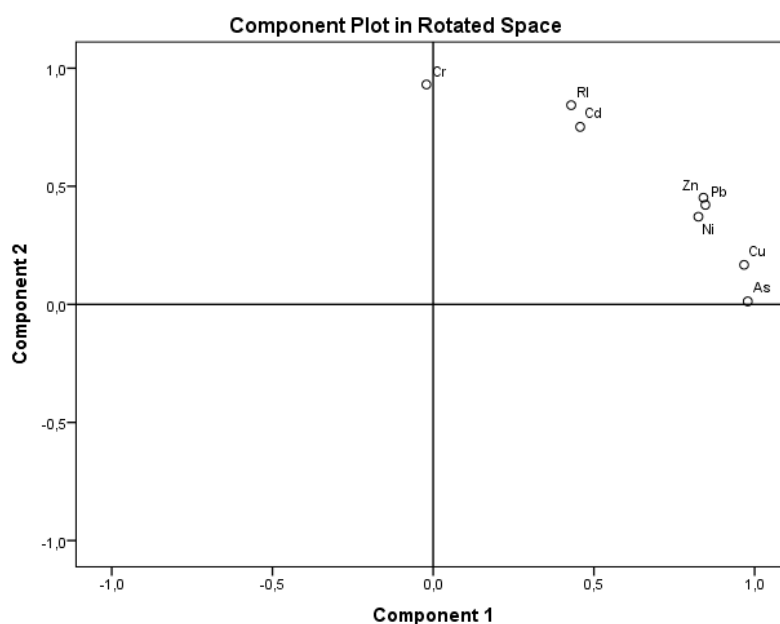

Figure S1. Loading plot of studied elements and RI.

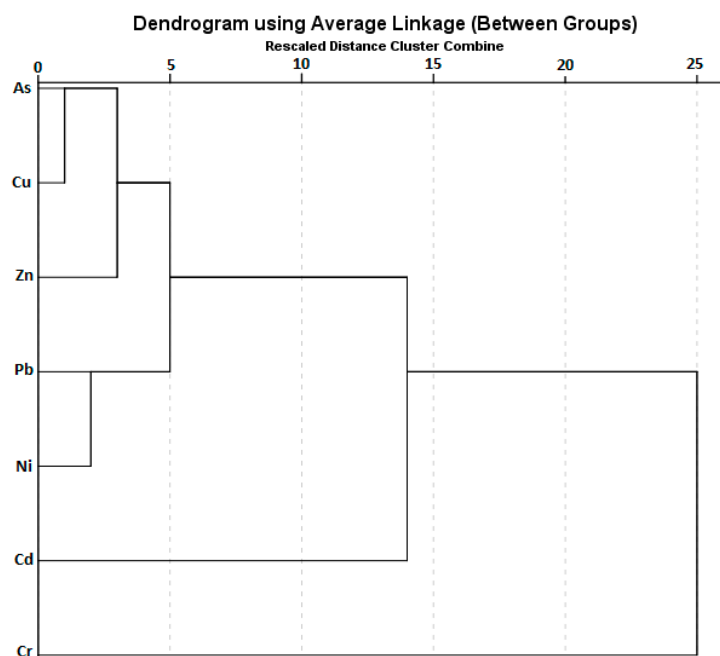

**Figure S2.** Dendrogram showing clusters of the elements.

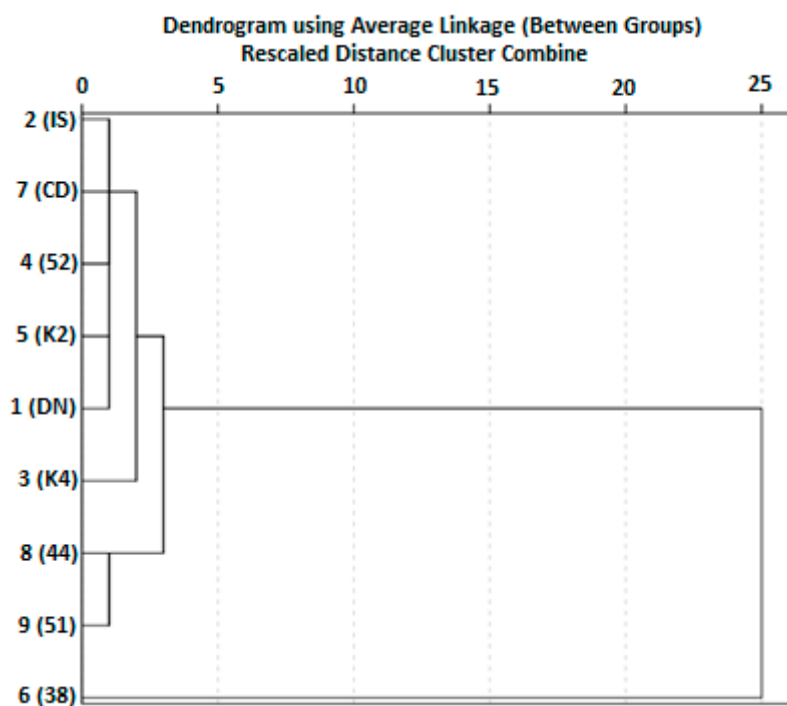

**Figure S3.** Dendrogram showing clusters of the studied sites.

### Table Captions:

**Table S1.** Certified values, analytical values, and recovery of the BCR Reference Material (BCR 701).

|     |                          | Cd          | Cr          | Cu          | Ni          | Pb          | Zn          |
|-----|--------------------------|-------------|-------------|-------------|-------------|-------------|-------------|
| F1* | Analytical value (mg/kg) | 7.61 ± 0.23 | 2.59 ± 0.11 | 48.5 ± 0.87 | 13.4 ± 0.36 | 2.98 ± 0.13 | 188.7 ± 5.4 |
|     |                          | 7.34 ± 0.35 | 2.26 ± 0.16 | 49.3 ± 1.7  | 15.4 ± 0.9  | 3.18 ± 0.21 | 205 ± 6.0   |
|     | Certified value (mg/kg)  |             |             |             |             |             |             |
|     | Recovery (%)             | 103.6       | 114.5       | 98.4        | 86.9        | 93.7        | 92.0        |

|       |                          |             |            |             |            |             |             |
|-------|--------------------------|-------------|------------|-------------|------------|-------------|-------------|
| F2**  | Analytical value (mg/kg) | 3.96 ± 0.22 | 45.4 ± 1.6 | 122.8 ± 3.8 | 24.9 ± 2.1 | 120.0 ± 4.3 | 105.6 ± 6.1 |
|       | Certified value (mg/kg)  | 3.77 ± 0.28 | 45.7 ± 2.0 | 124 ± 3.0   | 26.6 ± 1.3 | 126 ± 3.0   | 114 ± 5.0   |
|       | Recovery (%)             | 105.1       | 99.5       | 99.0        | 93.8       | 95.2        | 92.6        |
| F3*** | Analytical value (mg/kg) | 0.25 ± 0.01 | 130 ± 7.6  | 45.3 ± 1.8  | 13.4 ± 1.1 | 10.6 ± 1.8  | 42.7 ± 3.1  |
|       | Certified value (mg/kg)  | 0.27 ± 0.06 | 143 ± 7.0  | 55.2 ± 4.0  | 15.3 ± 0.9 | 9.3 ± 2.0   | 45.7 ± 4.0  |
|       | Recovery (%)             | 91.1        | 90.9       | 82.1        | 87.8       | 114.1       | 93.4        |

\*F1 – Exchangeable fraction; \*\*F2 – Reducible fraction; \*\*\*F3 – Oxidizable fraction;

**Table S2.** Category of risk assessment code.

| Class | RAC                | Category       |
|-------|--------------------|----------------|
| 1     | $RAC \leq 1$       | No risk        |
| 2     | $1 < RAC \leq 10$  | Light risk     |
| 3     | $10 < RAC \leq 30$ | Medium risk    |
| 4     | $30 < RAC \leq 50$ | High risk      |
| 5     | $50 < RAC$         | Very high risk |

**Table S3.** Values of  $I_{geo}$  and the pollution level.

| $I_{geo}$ rank | $I_{geo}$ | Pollution Level                             |
|----------------|-----------|---------------------------------------------|
| 0              | <0        | Uncontaminated                              |
| 1              | 0–1       | Uncontaminated to moderately contaminated   |
| 2              | 1–2       | Moderately contaminated                     |
| 3              | 2–3       | Moderately to strongly contaminated         |
| 4              | 3–4       | Strongly contaminated                       |
| 5              | 4–5       | Strongly to extremely strongly contaminated |
| 6              | >5        | Extremely contaminated                      |

**Table S4.** Values of EF and pollution level.

| Value             | Pollution Category |
|-------------------|--------------------|
| $EF < 1$          | No enrichment      |
| $1 < EF \leq 3$   | Minor              |
| $3 < EF \leq 5$   | Moderate           |
| $5 < EF \leq 10$  | Moderately severe  |
| $10 < EF \leq 25$ | Severe             |
| $25 < EF \leq 50$ | Very severe        |
| $> 50$            | Extremely severe   |

**Table S5.** Category of Ecological risk factor ( $Er^i$ ) and Ecological risk index (RI).

| Ecological risk factor ( $Er^i$ ) | RI                  | Category                     |
|-----------------------------------|---------------------|------------------------------|
| $Er^i \leq 40$                    | $RI \leq 150$       | Low ecological risk          |
| $40 < Er^i \leq 80$               | $150 < RI \leq 300$ | Moderate ecological risk     |
| $80 < Er^i \leq 160$              | $300 < RI \leq 600$ | Considerable ecological risk |
| $160 < Er^i \leq 320$             | $600 < RI$          | High ecological risk         |
| $320 < Er^i$                      |                     | Very high ecological risk    |

**Table S6.** Magnetic susceptibility measurements ( $10^{-3}$  SI units).

| Sample   | MS-1  | MS-2  | MS-3  | MS-Avg |
|----------|-------|-------|-------|--------|
| DN-2     | 0.02  | 0.019 | 0.017 | 0.019  |
| IŠ-2018  | 0.011 | 0.011 | 0.01  | 0.011  |
| K-4-2018 | 0.012 | 0.011 | 0.011 | 0.011  |

|          |       |       |       |       |
|----------|-------|-------|-------|-------|
| 52-2018  | 0.007 | 0.007 | 0.007 | 0.007 |
| K-2-2018 | 0.017 | 0.019 | 0.015 | 0.017 |
| 38-2018  | 0.038 | 0.041 | 0.034 | 0.038 |
| ČD-2018  | 0.016 | 0.011 | 0.016 | 0.014 |
| 44-2018  | 0.015 | 0.015 | 0.015 | 0.015 |
| 51-2018  | 0.017 | 0.017 | 0.019 | 0.018 |

**Table S7.** Rotated Component Matrix.

|           | Component 1 | Component 2 |
|-----------|-------------|-------------|
| <b>Cd</b> |             | 0.752       |
| <b>Cr</b> |             | 0.931       |
| <b>Cu</b> | 0.967       |             |
| <b>Pb</b> | 0.847       |             |
| <b>Zn</b> | 0.841       |             |
| <b>RI</b> |             | 0.844       |
| <b>Ni</b> | 0.825       |             |
| <b>As</b> | 0.979       |             |

#### **Details of BCR sequential extraction procedure:**

Sediment samples were analysed by the optimized BCR three step sequential extraction procedure [1–3]. A description of this procedure is given below and is as follows:

**Step 1** (fraction soluble in acid—metals exchangeable or associated with carbonates): Each 1 g of sample was added to 40 mL of a 0.11 mol L<sup>-1</sup> acetic acid solution, with agitation for 16 h at 22 °C. The extract was separated from the solid phase by centrifugation at 3000 rpm for 20 min and the supernatant was stored for later analysis.

**Step 2** (reducible fraction—metals associated with oxides of Fe and Mn): Residue from Stage 1 was added to 40 mL of a 0.5 mol L<sup>-1</sup> acid hydroxyl ammonium chloride solution (pH 1.5). The suspension was then agitated for 16 h at 22 °C. The extract was separated from the solid phase by centrifugation, as described for Stage 1.

**Step 3** (oxidizable fraction—metals associated with organic matter and sulfides): Residue from Stage 2 was added to 10 mL of 8.8 mol L<sup>-1</sup> H<sub>2</sub>O<sub>2</sub> solution (pH 2–3) and the mixture was left at room temperature for 1 h. It was then heated to 85 °C for 1 h in a water bath. Another 10 mL portion of 8.8 mol L<sup>-1</sup> H<sub>2</sub>O<sub>2</sub> solution was added and the mixture was heated to dryness at 85 °C. After cooling, 50 mL of a 1.0 mol L<sup>-1</sup> solution of ammonium acetate (pH 2) was added to the residue, followed by agitation for 16 h at 22 °C. The extract was separated from the solid phase by centrifugation, as above.

After the first three extraction steps, the extract was separated from solid residue by centrifugation at 3000 × g for 10 min, supernatant was decanted, diluted to 50 mL with 1M HNO<sub>3</sub>, and stored in a polyethylene bottle at 4 °C until metal analysis. The residue was washed with 20 mL deionized water and shaken for 15 min, followed by centrifugation for 10 min at 3000×g. The supernatant was decanted and discarded, acting cautiously to avoid discarding any solid residues. In this way, the residue was prepared for the next BCR step.

**Step 4** (residual fraction—metals strongly associated with the crystalline structure of minerals): The Stage 3 residue was digested using a mixture of the acids (8 mL aqua regia, 3:1, v/v, HCl to HNO<sub>3</sub>) on water bath at 85 °C, until the volume was reduced to 2–3 mL. Another 8 mL portion of aqua regia was added and the mixture was heated to dryness at 85 °C for 1 h. The final residue was dissolved in 1 M HNO<sub>3</sub> and diluted to 50 mL and stored in a polyethylene bottle at 4 °C until metal analysis. Digestion of the residual material is not specified in the BCR protocol.

#### **References**

1. de Andrade Passos, E.; Alves, J. C.; dos Santos, I.S.; Alves, J. P.H.; Garcia, C.A.B.; Costa C. S. Assessment of trace metals contamination in estuarine sediments using a sequential extraction technique and principal component analysis. *Microchem. J.* **2010**, *96*, 50–57.
2. Relić, D.; Đorđević, D.; Sakan, S.; Anđelković, I.; Pantelić, A.; Stanković, R.; Popović, A. Conventional, microwave, and ultrasound sequential extractions for the fractionation of metals in sediments within the Petrochemical Industry, Serbia. *Environ. Monit. Assess.* **2013**, *185* (9), 7627–7645.
3. Sakan, S.; Popović, A.; Anđelković, I.; Đorđević, D. Aquatic sediments pollution estimate using the metal fractionation, secondary phase enrichment factor calculation, and used statistical methods. *Env. Geochem. Health* **2016**, *38*, 855–867.
- 4.
